# Supplementary material for: A data-driven framework for assessing climatic impact drivers in the context of food security
Source: Copernicus journal article supplement (doi:10.5194/nhess-25-1387-2025), 2025-04-10
Supplement: Supplementary file 1 [file nhess-25-1387-2025-supplement.pdf]

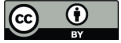

*Supplement of*

## **A data-driven framework for assessing climatic impact drivers in the context of food security**

**Marcos Roberto Benso et al.**

*Correspondence to:* Marcos Roberto Benso (marcosbenso@gmail.com)

The copyright of individual parts of the supplement might differ from the article licence.

## S1 Introduction

This supplemental document contains details of data pre-processing and provides additional visual aids for the main manuscripts. Readers might benefit from further details on how crop yield data were obtained and processed and further evaluation of the different crop yield datasets used.

## 5 S2 Crop yield data

### Data from Brazilian Institute of Geography and Statistics

Crop yield data is a crucial component in understanding the impacts of climate on food production. Crop yields are generally made available at the municipality level. In Brazil, the Brazilian Institute of Geography and Statistics (IBGE) and state agencies collect agricultural data using surveys, interviews, and expert elicitation to create an annual database for more than 40 crops at the municipal level (de Geografia e Estatística, 2022). The raw data from IBGE can be assessed in the Multidimensional Statistics Database (BME). One of the main challenges of this dataset is that data represents annual statistics and does not represent different cycles. The double cropping system is widely adopted in the study area, therefore representing a potential bottleneck. However, IBGE has started to collect maize in the first and second cycles since 2003. This matches the period when maize's second cycle is intensified in Brazil.

### 15 Data from Parana state statistical yearbooks

The Department of Rural Economy (Deral) of the Paraná state, Brazil, is also responsible for collecting crop data at the municipal level. The method of collecting and processing data is similar to what is done by IBGE; therefore, a high level of redundancy is expected from these two datasets. This redundancy is important to validate data and remove outliers that might reduce the quality of a model. The same number of municipalities selected using IBGE data was used in data from Deral. This dataset is derived from the Gross Value of Production, derived from the price and the quantity of production of 30 crops.

### 20 Global dataset of historical yields (GDHY)

The Global Dataset of Historical Yields is a global annual time series of 0.5 ° grid-cell estimates for maize, rice, wheat, and soybean from 1981 to 2016. For each grid cell, crop yields are estimated in ton/ha based on Food and Agriculture Organization (FAO) country-level yield statistics and then corrected using the remote-sensed leaf area index (LAI), the fraction of photosynthetically active radiation (FPAR) and crop-specific radiation use efficiency derived from reanalysis. Crop areas and crop calendars were derived from Monfreda et al. (2008) and Sacks et al. (2010). More details on the dataset are described in Iizumi and Sakai (2020) and Iizumi et al. (2014).

The dataset was aggregated to the municipal level using zonal statistics in the terra package (Hijmans, 2023) in R Studio.

In the literature, three major problems have been reported regarding the quality of crop yield data for risk analysis, namely the presence of outliers, technological trends, and heteroskedasticity. Removal of outliers is a complex problem, as we are dealing with extreme events. The definition of an outlier must be carefully taken to remove valuable data.

According to Ozaki et al. (2008), soybean and maize crop yield data tend to correlate, considering drought years, present correlation within approximately 150 km, and, within this range, the normality assumption can be supported. Therefore, for simplification, we assumed that crop yields within the immediate IBGE region are highly correlated, that is,  $R^2 > 0.6$  and p-value  $< 0.05$ .

Changes in technology in seed production, fertilizers, and land management impact crop yields (Liu and Ker, 2020). This effect is well documented in the agronomic literature and increases the averages and leads to changes in non-constant variance, i.e., heteroskedasticity (Tolhurst and Ker, 2015; Harri et al., 2011). The effect of timely technological adoption and improvements on crop yields was treated in a two-step process as proposed by Zhu et al. (2011), first by removing trends and then testing and adjusting the heteroskedasticity of the residuals.

In the first step, we tested the presence of monotonic trends using the Mann-Kendall test (Mann, 1945) with the Kendall R Package (McLeod, 2022). If the Mann-Kendall indicates a p-value lower than 0.05, the null hypothesis is accepted, and the crop yield series is considered to have a monotonic trend that must be corrected. We choose the Local Polynomial Regression Fitting (LOESS) (Cleveland et al., 2017) to model crop yields  $y_t$  at the year  $t$ . The residuals  $\epsilon_t$  are considered to be the detrended crop yields.

We tested heteroskedasticity in the data using the Pagan-Breusch test (Breusch and Pagan, 1979). If the p-value of the test is lower than 0.05, then the null hypothesis is rejected, and the yield series is considered heteroskedastic. We compute the normalized residuals  $y_t^n$  for two cases in this case. The first case is when the errors are proportional to the yield level. Then, we obtain the  $y_t^n$  considering the proportional error  $\varepsilon_t$ , calculated by dividing the error term from the LOESS prediction function  $\varepsilon_t$  by the yield predicted by the function. Lastly, the proportional errors are multiplied by the yields observed in 2021. With this procedure, the past yields are expressed in terms of 2010 technology. Otherwise, when the residuals are not proportional to the yield levels,  $y_t^n$  is calculated by adding 2010 yields to the residuals of the LOESS prediction function.

After obtaining a consistent time series corrected for trends, heteroskedasticity, and outliers, the next step is adjusting for a distribution function. Statistical modeling of crop yields is relevant for risk management because we do not have a time series long enough to empirically evaluate risk (Liu and Ker, 2020) empirically. Several parametric and nonparametric distribution functions have been proposed to model crop yields (Ozaki et al., 2008). We selected the gamma distribution because it allows one to simulate positive and negative skewness. The flexibility to assume different shapes according to the parameters  $c(\alpha, \beta)$ , the shape and rate parameters, respectively. For the gamma distribution, when  $\alpha$  is greater than 1, the distribution is skewed to the right, that is, skewed towards higher crop yields. Otherwise, the distribution is skewed towards lower yields.

To eliminate potential outliers, we excluded values considering each year and immediate region within the state. This was done because he hypothesizes that within the immediate region, the crop yields should be similar. The hypothesis of high correlation of crop yields within studied regions was confirmed for the soybean (Fig. S1) and maize (Fig S2) data, indicating that this strategy is adequate. Since soybeans have a longer record, the correlations were more stable in the immediate regions and tended to have higher values.

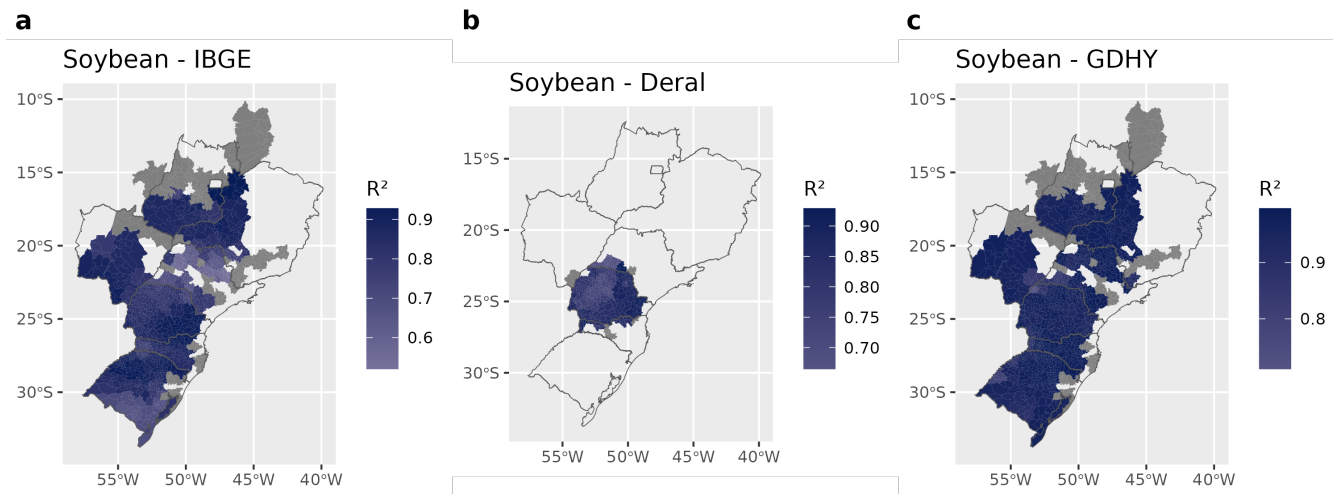

**Figure S1.** Spatial correlation of municipal soybean crop yields for each dataset, IBGE, Deral and GDHY

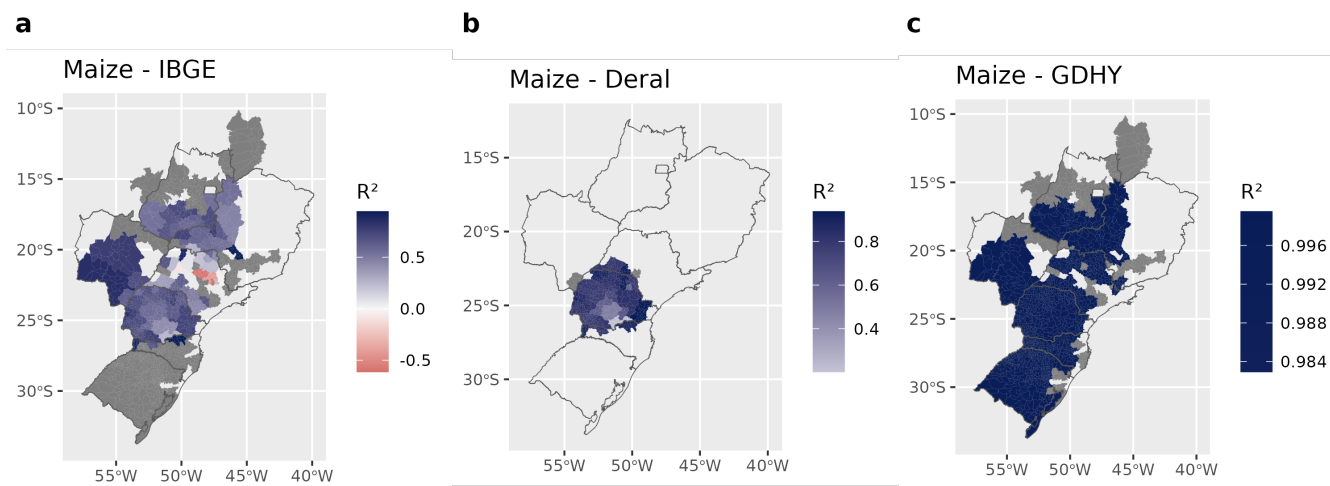

**Figure S2.** Spatial correlation of municipal maize crop yields for each dataset, IBGE, Deral and GDHY

- 65 The comparison of the datasets used in this study is vital to evaluate the reliability of the data. High-quality crop yield data improves calibration of crop growth models (Rosenzweig et al., 2014). However, they have a broader application in geosciences. Crop yield data is used to parameterize watershed hydrological models, especially in agricultural catchments, and improves the simulation of soil moisture (Sinnathamby et al., 2017). For water resources management, using higher quality crop yield data has improved global knowledge on the water-food-energy nexus (Ai and Hanasaki, 2023; Wang et al., 2023).
- 70 We compared crop yields at the municipal level in Brazil. As observed in Figures S3 and S4, IBGE and Parná Deral data for soybeans and maize are highly correlated; however, outliers were detected in both datasets. The outlier removal process improved the agreement between the two datasets, suggesting that eliminating data improved the dataset's quality. Since Deral is only available in Paraná, for the other states of Brazil, only GDHY and IBGE were compared. The global dataset of historical yields aggregated at the municipal level has a weak association with the other datasets. This result confirms what was reported
- 75 by Iizumi et al. (2014). The GDHY is based on satellite data collected from a fixed cropland map. In many regions of Brazil there is a noticeable increase in croplands, which can influence the estimation of GHDY. Also, the exact location of the planted area within each municipality can vary from year to year.

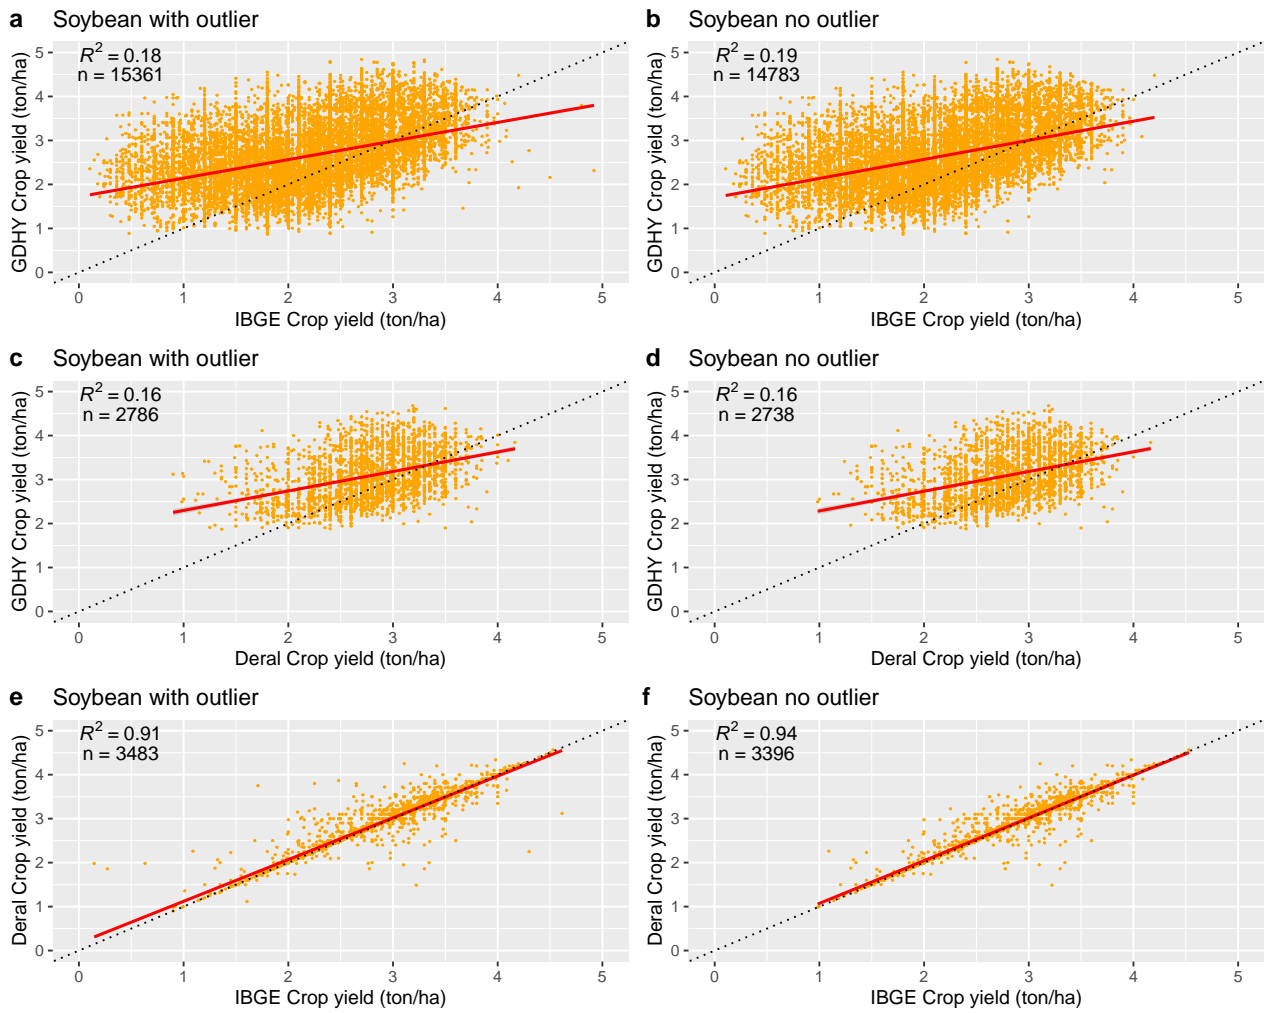

**Figure S3.** Correlation analysis of three different datasets for soybean crop yields: (Global dataset of historical yields ( $yield_{gdhy}$ ), Brazilian Institute for Geography and Statistics ( $yield_{IBGE}$ ), and Paraná Department of Rural Economy ( $yield_{PR}$ ))

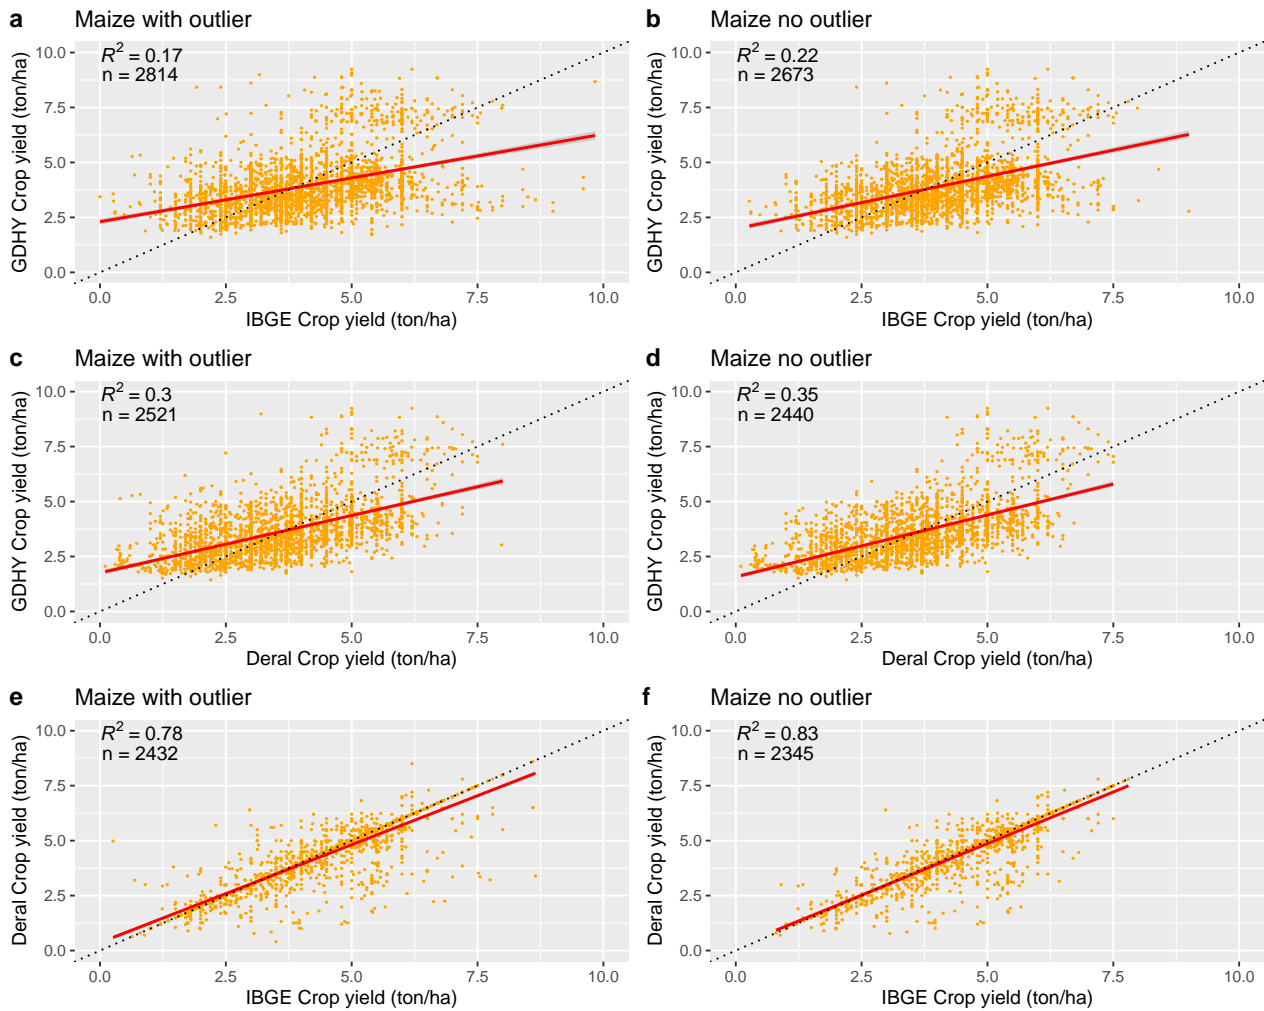

**Figure S4.** Correlation analysis of three different datasets for maize second cycle crop yields: (Global dataset of historical yields ( $yield_{gdhy}$ ), Brazilian Institute for Geography and Statistics ( $yield_{IBGE}$ ), and Paraná Department of Rural Economy ( $yield_{PR}$ ))

In order to evaluate risk, testing and removing trends is a fundamental step to remove the effects of technology advances on the data (Harri et al., 2011). The Mann-Kendall trend analysis of soybean and maize yields for Brazilian municipalities considering three datasets unveiled a consistent pattern of trends. Data for all municipalities in our study presented significant positive monotonic trends considering p values less than 0.05. For maize, on the other hand, significant positive monotonic trends were observed in the majority of municipalities. However, they were not universally present in the states of MS, GO, SP, and MG in the IBGE dataset. The lack of trends can be attributed to a limitation of the dataset, particularly related to not having long-term data for the second maize cycle.

Since most data presented positive trends, we applied a LOESS model for all the municipalities. The residuals of the LOESS models were then tested for heteroscedasticity. Other studies evaluated the presence of heteroscedasticity in crop yield data, Vicente (2004) was tested using the Brazilian agricultural census 1995/1996, Ozaki et al. (2008) for soybean, maize, and wheat in Paraná, and Rodrigues et al. (2013) at farm-level studies in São Paulo.

The presence of heteroscedasticity represents systematic changes in crop yield data Yang et al. (1992) and to the best of our knowledge, this is the first study that considers and evaluates spatial characteristics of heteroscedasticity of municipal level in the long term.

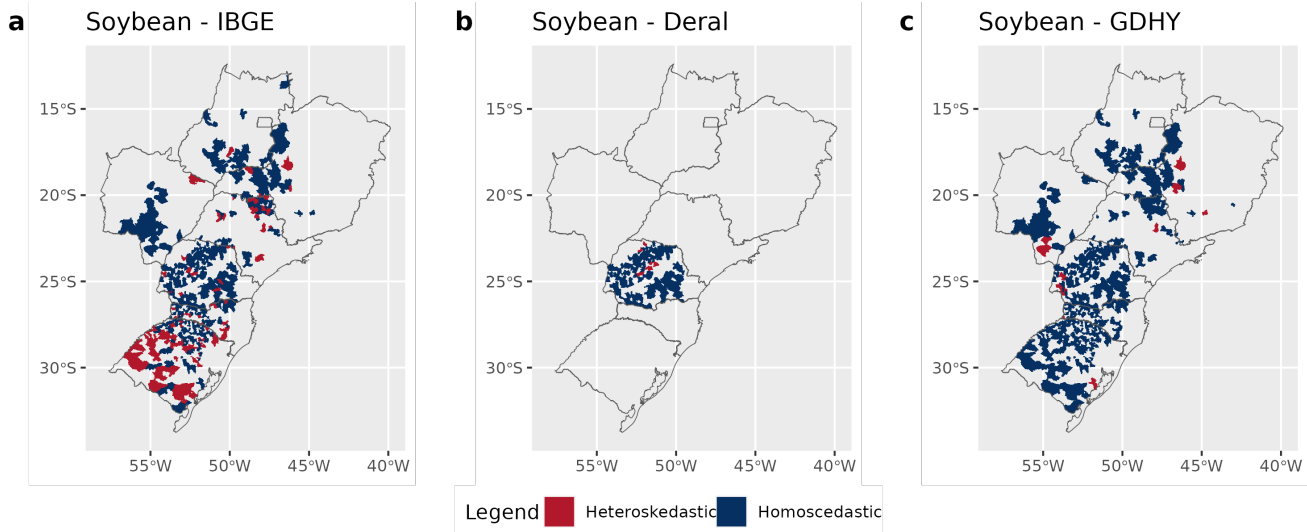

**Figure S5.** Heteroskedasticity Test Results for soybean crop yields in Brazilian Municipalities

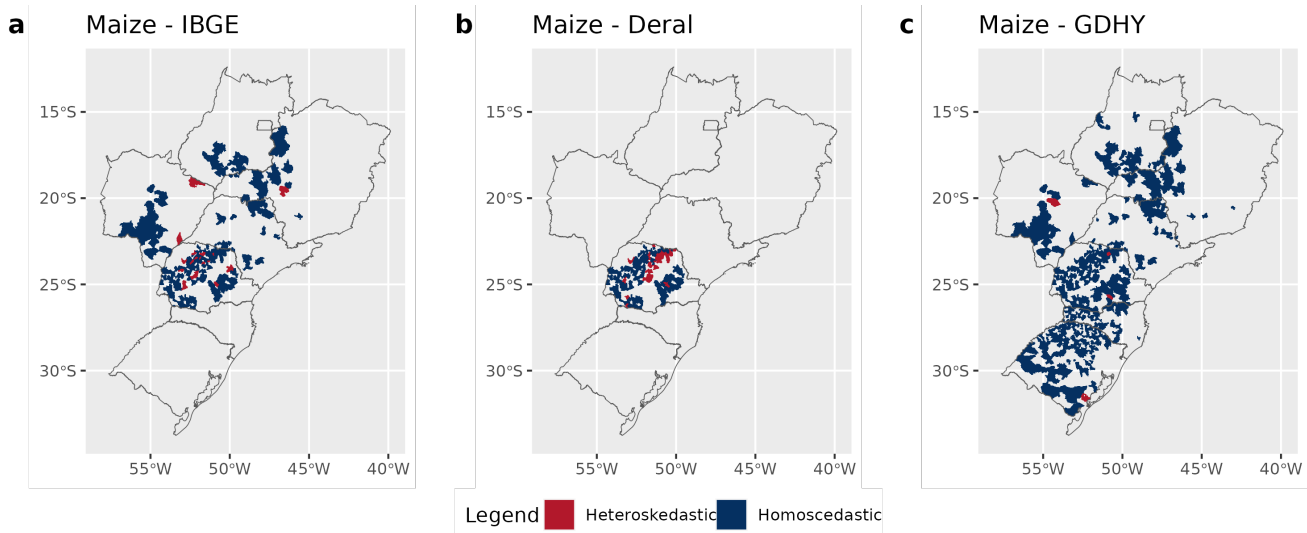

**Figure S6.** Heteroskedasticity Test Results for maize crop yields in Brazilian Municipalities

### S3 Crop yield risk monitoring

To illustrate the relationship between extreme climate impacts on food production and climate indices, we highlight the main loss events from 1997 to 2021 in the study area in Figure S7. Several distinct periods of crop yield losses emerged during the

95 study period, which required further analysis. The notable events among these were 2010 for soybeans, with an average of 16% of crop yield losses, and 2021 for maize, with an average of 40%, which impacted agricultural productivity in the region.

100 The patterns of crop yield losses observed in the region raise two main concerns. The first is that the severe crop yield losses presented in the previous examples have happened only once in the entire time series, representing an imbalance in the values of the data set. One implication of this situation is that models might not have sufficient cases of severe failure to be trained adequately and might underestimate losses. The second concern is related to the decision of what to do with these anomalous events. Possible solutions are to use it for training, testing, or removing it from the dataset. We opted to maintain these events in the analysis with the warning that this might interfere with model performance. However, we wanted to evaluate the ability of the model to predict unprecedented loss events. As our aim was to assess the effects of extreme climate events, we opted to retain all of these extreme events within the dataset.

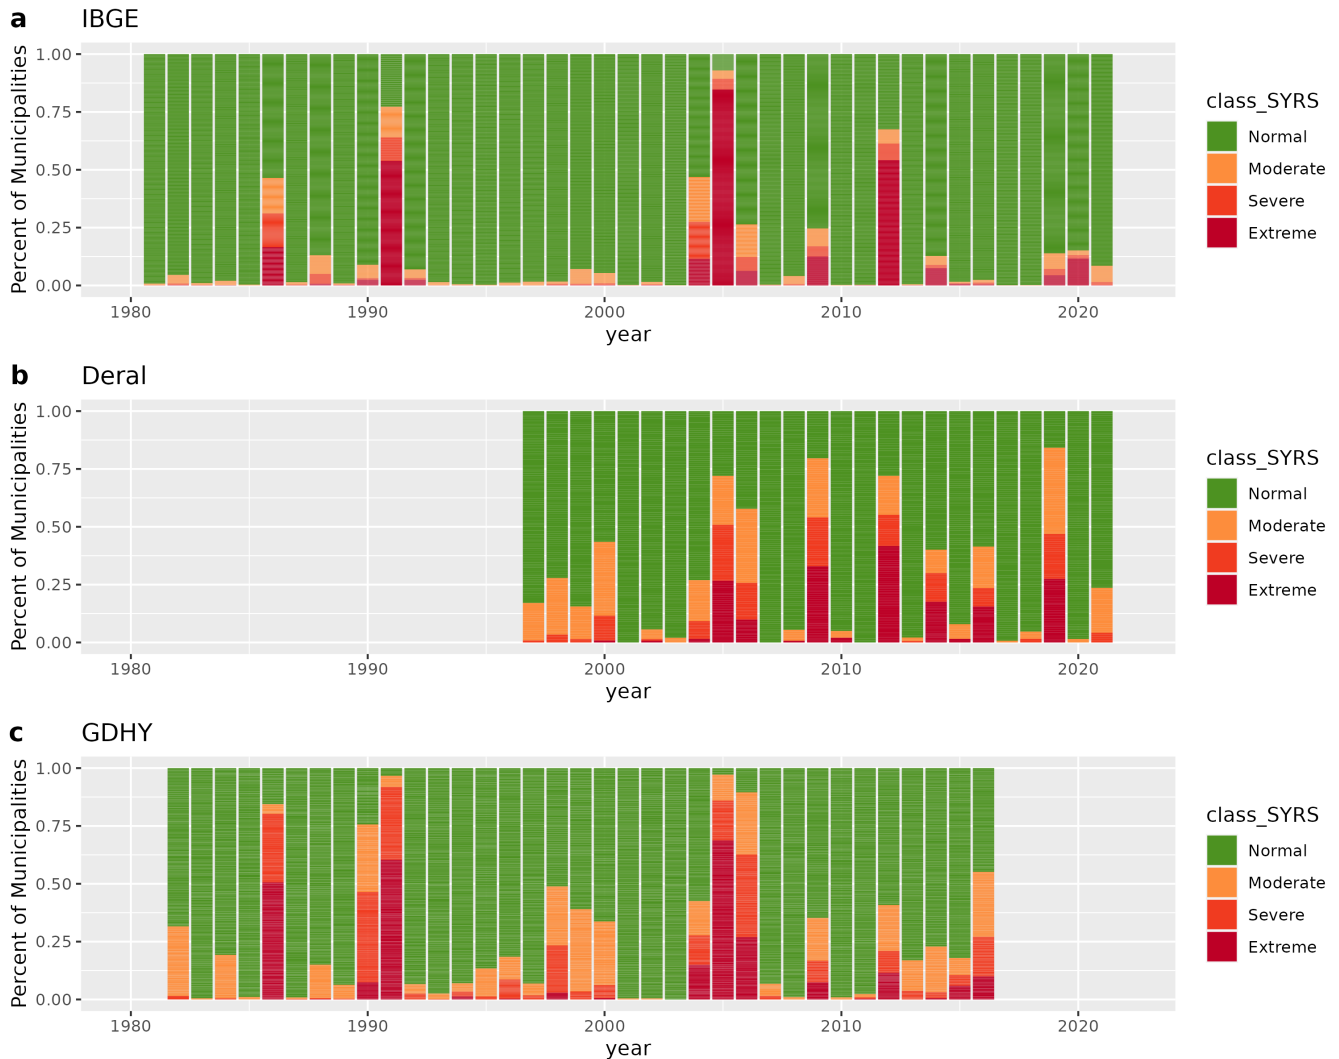

**Figure S7.** Temporal Variation of Soybean Crop Yields Across Risk Classes for IBGE, Deral and GDHY Datasets. The year-to-year distribution of crop yields is categorized into four risk classes: 'Normal,' 'Moderate,' 'Severe,' and 'Extreme.'



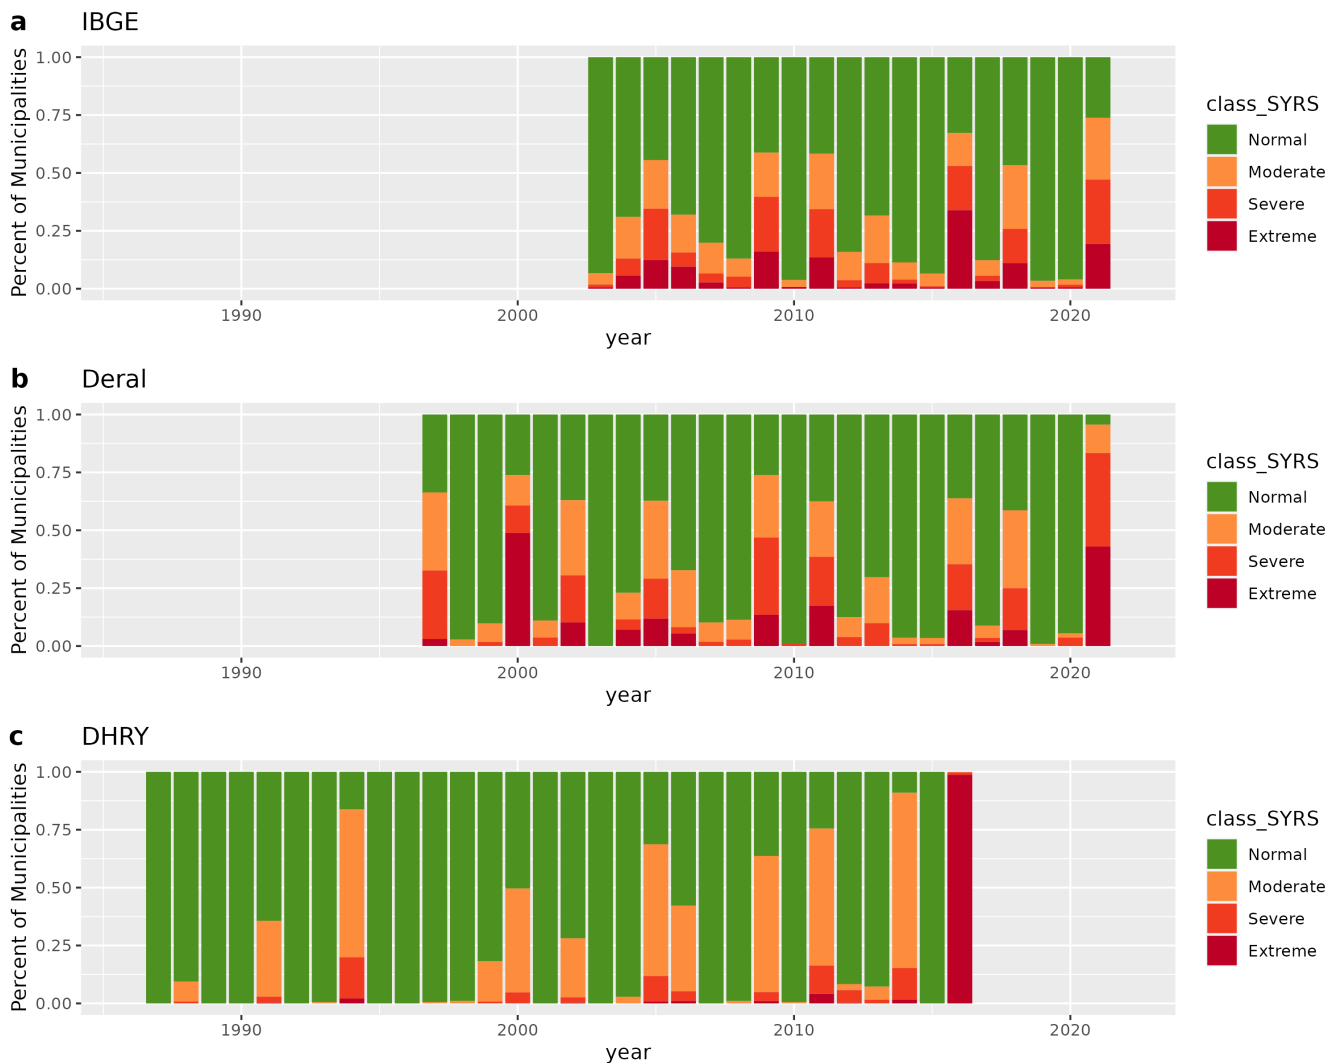

**Figure S8.** Temporal Variation of Maize Crop Yields Across Risk Classes for IBGE, Deral and GDHY Datasets. The year-to-year distribution of crop yields is categorized into four risk classes: 'Normal,' 'Moderate,' 'Severe,' and 'Extreme.'

## 105 S4 SHAP Algorithm

In Fig. S9, we provide a graphical illustration of the black box approach in which the XGBoost algorithm uses three features, Temperature (Temp), Precipitation (Prec), and Standardised Precipitation Evapotranspiration Index (SPEI) to make a prediction. The difference between base prediction and the model output, also called SHAP Value, is explained with SHAP explanations.

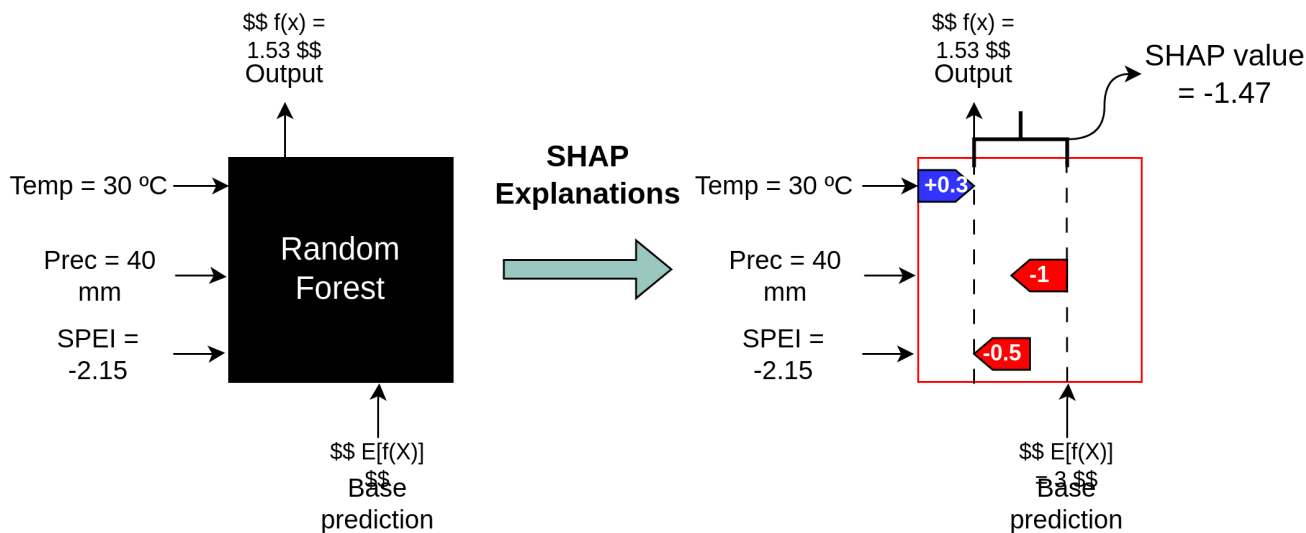

**Figure S9.** Demonstration of SHAP Explanations. Adapted from Lundberg (2023)

## 110 S5 Identifying key climatic impact-drivers

The analysis presented in Table SS1 reveals that variables such as *tnx* (indicative of extreme heat), *spei\_3month* (a drought index), and *prcptot* (precipitation totals) are consistently identified as the most significant variables in various regions. These indices are crucial for predicting the target variable, most likely crop yield losses, as they represent key climate impact drivers. In particular, extreme heat and drought appear to have a profound effect on agricultural results.

115 The significance of climate variables varies across geographic regions. For instance, in Paraná (PR), factors like *tnx\_Feb* (extreme heat in February) and *spei\_3month\_Feb* (February drought) are particularly critical, highlighting heat stress and drought as major concerns for this area during this time. Conversely, in Minas Gerais (MG), variables such as *temp\_Jan* (mean air temperature in January) and *tnn\_Jan* (extreme cold in January) are more significant, indicating that both heat and cold extremes must be taken into account in this region.

120 Certain months, particularly February and January, prominently appear in multiple significant variables, emphasizing the seasonal effects of climate impacts. For example, February is notably a crucial month for extreme heat and drought events in various areas. This time-related aspect is vital for comprehending when climate factors most significantly influence agricultural systems, providing insights into seasonal patterns that can guide agricultural planning decisions.

125 The table offers valuable insights into the climate hazards that significantly impact the model's predictions. Variables related to extreme heat, like *tnx*, *txn*, and *ttx*, consistently rank highest across different regions, demonstrating that heat stress is a key factor influencing the target variable. Additionally, drought indicators, such as *spei\_3month*, and total precipitation (e.g., *prcptot*) also hold high importance, underscoring the role of water availability in outcomes such as crop yields. This underscores the urgent need to manage both heat and water stress in agricultural systems.

130 The results from this Random Forest model uncover several significant trends. Firstly, it emphasizes the importance of temperature extremes and drought indices, indicating that fluctuations in temperature and water stress are key determinants of the target outcome. Furthermore, the model accounts for spatial and temporal variations, which is essential for enhancing predictive precision across various regions and time frames.

|     | Overall   | Variables       | rank | UF | dataset | month | hazards            |
|-----|-----------|-----------------|------|----|---------|-------|--------------------|
| 1   | 100.00000 | tnx_Feb         | 1    | PR | Deral   | Feb   | extreme_heat       |
| 2   | 60.99664  | spei_3month_Feb | 2    | PR | Deral   | Feb   | drought            |
| 3   | 45.89551  | prcptot_Dec     | 3    | PR | Deral   | Dec   | mean_precipitation |
| 4   | 34.99172  | su_Feb          | 4    | PR | Deral   | Feb   | extreme_heat       |
| 5   | 31.89870  | txn_Oct         | 5    | PR | Deral   | Oct   | extreme_heat       |
| 6   | 26.03781  | dtr_Oct         | 6    | PR | Deral   | Oct   | mean_air_temp      |
| 7   | 16.10180  | spei_3month_Dec | 7    | PR | Deral   | Dec   | drought            |
| 8   | 15.23229  | dtr_Nov         | 8    | PR | Deral   | Nov   | mean_air_temp      |
| 9   | 15.15879  | dtr_Dec         | 9    | PR | Deral   | Dec   | mean_air_temp      |
| 10  | 13.13012  | dtr_Feb         | 10   | PR | Deral   | Feb   | mean_air_temp      |
| 69  | 100.00000 | temp_Jan        | 1    | MG | GDHY    | Jan   | mean_air_temp      |
| 70  | 90.78860  | tnn_Jan         | 2    | MG | GDHY    | Jan   | extreme_heat       |
| 71  | 78.32961  | tnx_Feb         | 3    | MG | GDHY    | Feb   | extreme_heat       |
| 72  | 55.61309  | txn_Jan         | 4    | MG | GDHY    | Jan   | extreme_heat       |
| 73  | 50.20335  | spei_3month_Dec | 5    | MG | GDHY    | Dec   | drought            |
| 74  | 46.13138  | dtr_Dec         | 6    | MG | GDHY    | Dec   | mean_air_temp      |
| 75  | 44.31361  | temp_Dec        | 7    | MG | GDHY    | Dec   | mean_air_temp      |
| 76  | 39.82485  | tnx_Jan         | 8    | MG | GDHY    | Jan   | extreme_heat       |
| 77  | 37.49046  | dtr_Nov         | 9    | MG | GDHY    | Nov   | mean_air_temp      |
| 78  | 34.23006  | txn_Oct         | 10   | MG | GDHY    | Oct   | extreme_heat       |
| 137 | 100.00000 | temp_Jan        | 1    | MS | GDHY    | Jan   | mean_air_temp      |
| 138 | 68.94557  | spei_3month_Feb | 3    | MS | GDHY    | Feb   | drought            |
| 139 | 66.48501  | dtr_Oct         | 4    | MS | GDHY    | Oct   | mean_air_temp      |
| 140 | 64.68782  | tnx_Feb         | 5    | MS | GDHY    | Feb   | extreme_heat       |
| 141 | 63.31379  | tx10p_Jan       | 6    | MS | GDHY    | Jan   | cold_spell         |
| 142 | 63.07101  | su_Jan          | 7    | MS | GDHY    | Jan   | extreme_heat       |
| 143 | 61.21219  | tnx_Jan         | 8    | MS | GDHY    | Jan   | extreme_heat       |
| 144 | 55.96900  | prcptot_Feb     | 9    | MS | GDHY    | Feb   | mean_precipitation |
| 145 | 54.61341  | txx_Feb         | 10   | MS | GDHY    | Feb   | extreme_heat       |
| 210 | 100.00000 | temp_Nov        | 1    | PR | GDHY    | Nov   | mean_air_temp      |
| 211 | 94.07476  | temp_Oct        | 2    | PR | GDHY    | Oct   | mean_air_temp      |
| 212 | 91.89831  | txn_Oct         | 3    | PR | GDHY    | Oct   | extreme_heat       |
| 213 | 65.60651  | tnn_Oct         | 4    | PR | GDHY    | Oct   | extreme_heat       |
| 214 | 53.73975  | tr_Oct          | 5    | PR | GDHY    | Oct   | extreme_heat       |
| 215 | 49.21974  | dtr_Oct         | 6    | PR | GDHY    | Oct   | mean_air_temp      |

|     |           |                 |    |    |      |     |                     |
|-----|-----------|-----------------|----|----|------|-----|---------------------|
| 216 | 47.51726  | tnx_Nov         | 7  | PR | GDHY | Nov | extreme_heat        |
| 217 | 46.70260  | temp_Dec        | 8  | PR | GDHY | Dec | mean_air_temp       |
| 218 | 45.26252  | tnx_Feb         | 9  | PR | GDHY | Feb | extreme_heat        |
| 219 | 44.67547  | txx_Feb         | 10 | PR | GDHY | Feb | extreme_heat        |
| 275 | 100.00000 | tnx_Jan         | 1  | RS | GDHY | Jan | extreme_heat        |
| 276 | 86.92816  | prcptot_Dec     | 2  | RS | GDHY | Dec | mean_precipitation  |
| 277 | 72.28343  | r10mm_Dec       | 3  | RS | GDHY | Dec | heavy_precipitation |
| 278 | 68.07999  | txx_Jan         | 4  | RS | GDHY | Jan | extreme_heat        |
| 279 | 52.90353  | dtr_Nov         | 5  | RS | GDHY | Nov | mean_air_temp       |
| 280 | 49.35403  | spei_3month_Feb | 6  | RS | GDHY | Feb | drought             |
| 281 | 45.35339  | prcptot_Feb     | 7  | RS | GDHY | Feb | mean_precipitation  |
| 282 | 42.93565  | tnx_Nov         | 8  | RS | GDHY | Nov | extreme_heat        |
| 283 | 38.94912  | prcptot_Nov     | 9  | RS | GDHY | Nov | mean_precipitation  |
| 284 | 38.70593  | prcptot_Jan     | 10 | RS | GDHY | Jan | mean_precipitation  |
| 348 | 100.00000 | tnx_Jan         | 1  | SC | GDHY | Jan | extreme_heat        |
| 349 | 25.86169  | tx90p_Oct       | 2  | SC | GDHY | Oct | extreme_heat        |
| 350 | 25.42701  | dtr_Feb         | 3  | SC | GDHY | Feb | mean_air_temp       |
| 351 | 22.95067  | spei_3month_Feb | 4  | SC | GDHY | Feb | drought             |
| 352 | 22.75066  | txn_Dec         | 5  | SC | GDHY | Dec | extreme_heat        |
| 353 | 20.97155  | prcptot_Feb     | 6  | SC | GDHY | Feb | mean_precipitation  |
| 354 | 18.95401  | tnn_Dec         | 7  | SC | GDHY | Dec | extreme_heat        |
| 355 | 15.68545  | txx_Feb         | 8  | SC | GDHY | Feb | extreme_heat        |
| 356 | 14.64066  | spei_6month_Oct | 9  | SC | GDHY | Oct | drought             |
| 357 | 13.28630  | spei_3month_Jan | 10 | SC | GDHY | Jan | drought             |
| 417 | 100.00000 | txn_Dec         | 1  | SP | GDHY | Dec | extreme_heat        |
| 418 | 64.72215  | temp_Dec        | 2  | SP | GDHY | Dec | mean_air_temp       |
| 419 | 63.21173  | tnn_Dec         | 3  | SP | GDHY | Dec | extreme_heat        |
| 420 | 53.35772  | tnx_Dec         | 4  | SP | GDHY | Dec | extreme_heat        |
| 421 | 46.85076  | dtr_Dec         | 5  | SP | GDHY | Dec | mean_air_temp       |
| 422 | 38.25983  | tx90p_Oct       | 7  | SP | GDHY | Oct | extreme_heat        |
| 423 | 37.62061  | txx_Dec         | 8  | SP | GDHY | Dec | extreme_heat        |
| 424 | 36.21886  | tnn_Jan         | 9  | SP | GDHY | Jan | extreme_heat        |
| 425 | 34.00213  | su_Dec          | 10 | SP | GDHY | Dec | extreme_heat        |
| 489 | 100.00000 | dtr_Feb         | 1  | MG | IBGE | Feb | mean_air_temp       |
| 490 | 90.38603  | dtr_Jan         | 2  | MG | IBGE | Jan | mean_air_temp       |

|     |           |                 |    |    |      |     |                     |
|-----|-----------|-----------------|----|----|------|-----|---------------------|
| 491 | 59.19799  | tnx_Jan         | 3  | MG | IBGE | Jan | extreme_heat        |
| 492 | 58.55139  | tnn_Feb         | 4  | MG | IBGE | Feb | extreme_heat        |
| 493 | 56.02843  | prcptot_Feb     | 5  | MG | IBGE | Feb | mean_precipitation  |
| 494 | 55.44643  | txn_Feb         | 6  | MG | IBGE | Feb | extreme_heat        |
| 495 | 48.38260  | spei_3month_Feb | 7  | MG | IBGE | Feb | drought             |
| 496 | 48.15441  | prcptot_Nov     | 8  | MG | IBGE | Nov | mean_precipitation  |
| 497 | 47.54246  | dtr_Oct         | 9  | MG | IBGE | Oct | mean_air_temp       |
| 498 | 47.39682  | temp_Feb        | 10 | MG | IBGE | Feb | mean_air_temp       |
| 555 | 100.00000 | spei_3month_Feb | 1  | MS | IBGE | Feb | drought             |
| 556 | 62.18494  | prcptot_Feb     | 2  | MS | IBGE | Feb | mean_precipitation  |
| 557 | 27.14332  | spi_6month_Feb  | 3  | MS | IBGE | Feb | drought             |
| 558 | 25.20665  | spei_6month_Feb | 4  | MS | IBGE | Feb | drought             |
| 559 | 17.57680  | tnx_Feb         | 5  | MS | IBGE | Feb | extreme_heat        |
| 560 | 15.85621  | txx_Feb         | 6  | MS | IBGE | Feb | extreme_heat        |
| 561 | 14.87482  | spei_3month_Jan | 7  | MS | IBGE | Jan | drought             |
| 562 | 13.31633  | dtr_Jan         | 8  | MS | IBGE | Jan | mean_air_temp       |
| 563 | 12.22819  | dtr_Dec         | 9  | MS | IBGE | Dec | mean_air_temp       |
| 564 | 11.46425  | temp_Jan        | 10 | MS | IBGE | Jan | mean_air_temp       |
| 628 | 100.00000 | spei_3month_Feb | 1  | PR | IBGE | Feb | drought             |
| 629 | 58.20304  | prcptot_Dec     | 2  | PR | IBGE | Dec | mean_precipitation  |
| 630 | 55.22292  | tnx_Feb         | 3  | PR | IBGE | Feb | extreme_heat        |
| 631 | 27.02189  | tnx_Nov         | 4  | PR | IBGE | Nov | extreme_heat        |
| 632 | 24.09338  | dtr_Feb         | 5  | PR | IBGE | Feb | mean_air_temp       |
| 633 | 23.54219  | prcptot_Feb     | 6  | PR | IBGE | Feb | mean_precipitation  |
| 634 | 21.53629  | dtr_Nov         | 7  | PR | IBGE | Nov | mean_air_temp       |
| 635 | 16.68468  | spei_6month_Feb | 8  | PR | IBGE | Feb | drought             |
| 636 | 16.61503  | tnn_Oct         | 9  | PR | IBGE | Oct | extreme_heat        |
| 637 | 16.27090  | txx_Feb         | 10 | PR | IBGE | Feb | extreme_heat        |
| 695 | 100.00000 | spei_3month_Feb | 1  | RS | IBGE | Feb | drought             |
| 696 | 78.11165  | prcptot_Feb     | 2  | RS | IBGE | Feb | mean_precipitation  |
| 697 | 42.98244  | prcptot_Jan     | 3  | RS | IBGE | Jan | mean_precipitation  |
| 698 | 36.42602  | prcptot_Dec     | 4  | RS | IBGE | Dec | mean_precipitation  |
| 699 | 31.35147  | r10mm_Dec       | 5  | RS | IBGE | Dec | heavy_precipitation |
| 700 | 29.18250  | dtr_Oct         | 6  | RS | IBGE | Oct | mean_air_temp       |
| 701 | 19.06189  | spei_3month_Jan | 7  | RS | IBGE | Jan | drought             |
| 702 | 18.24222  | r10mm_Jan       | 8  | RS | IBGE | Jan | heavy_precipitation |
| 703 | 14.84210  | prcptot_Oct     | 9  | RS | IBGE | Oct | mean_precipitation  |

|     |           |                 |    |    |      |     |                     |
|-----|-----------|-----------------|----|----|------|-----|---------------------|
| 704 | 14.39600  | tnx_Jan         | 10 | RS | IBGE | Jan | extreme_heat        |
| 770 | 100.00000 | tnx_Jan         | 1  | SC | IBGE | Jan | extreme_heat        |
| 771 | 56.02377  | temp_Jan        | 2  | SC | IBGE | Jan | mean_air_temp       |
| 772 | 48.16173  | spei_3month_Feb | 3  | SC | IBGE | Feb | drought             |
| 773 | 46.39182  | prcptot_Feb     | 4  | SC | IBGE | Feb | mean_precipitation  |
| 774 | 31.39655  | tnx_Feb         | 5  | SC | IBGE | Feb | extreme_heat        |
| 775 | 25.19294  | tnn_Feb         | 6  | SC | IBGE | Feb | extreme_heat        |
| 776 | 23.85294  | tnn_Jan         | 7  | SC | IBGE | Jan | extreme_heat        |
| 777 | 22.63478  | temp_Nov        | 8  | SC | IBGE | Nov | mean_air_temp       |
| 778 | 16.09298  | r10mm_Feb       | 9  | SC | IBGE | Feb | heavy_precipitation |
| 779 | 15.54663  | txn_Nov         | 10 | SC | IBGE | Nov | extreme_heat        |
| 838 | 100.00000 | txn_Dec         | 1  | SP | IBGE | Dec | extreme_heat        |
| 839 | 96.21386  | tnn_Dec         | 2  | SP | IBGE | Dec | extreme_heat        |
| 840 | 96.17796  | temp_Nov        | 3  | SP | IBGE | Nov | mean_air_temp       |
| 841 | 91.15508  | tnn_Oct         | 4  | SP | IBGE | Oct | extreme_heat        |
| 842 | 89.22131  | temp_Oct        | 5  | SP | IBGE | Oct | mean_air_temp       |
| 843 | 85.13383  | temp_Jan        | 6  | SP | IBGE | Jan | mean_air_temp       |
| 844 | 77.75324  | temp_Dec        | 7  | SP | IBGE | Dec | mean_air_temp       |
| 845 | 76.73861  | txn_Nov         | 8  | SP | IBGE | Nov | extreme_heat        |
| 846 | 76.36698  | txn_Oct         | 9  | SP | IBGE | Oct | extreme_heat        |
| 847 | 75.43840  | tnn_Jan         | 10 | SP | IBGE | Jan | extreme_heat        |

**Table S1.** Variable Importance Analysis in Random Forest for Soybean Yield Prediction Across Brazilian States. The figure illustrates the variable importance scores obtained from Random Forest models applied to three distinct datasets: Deral, IBGE, and GDHY, encompassing seven Brazilian states - RS, SC, PR, SP, MS, MG, and GO

135 Table SS2 offers a ranking of climate variables impacting Maize second cycle various regions across Brazil, sorted by state, month, and type of hazard. It emphasizes extreme climate conditions such as severe heat, droughts, cold snaps, and average air temperature. The data is divided based on the overall influence of these variables in different months, illustrating how different regions (denoted by their state abbreviations) are affected.

140 In the state of Paraná (PR), April precipitation (prcptot\_Apr) held the top rank, followed by extreme heat conditions in May (tnn\_May), and these variables markedly impacted the agricultural outcomes in both months. Furthermore, mean air temperatures in April and May (temp\_Apr, temp\_May), along with July precipitation (prcptot\_Jul), were also key factors, indicating the significant role of both rainfall and temperature.

145 Conversely, in Goiás (GO), the highest-ranking variable was the diurnal temperature range in April (dtr\_Apr). Significant factors also included extreme heat in May (tnn\_May) and high precipitation levels in February (prcptot\_Feb) and May (prcptot\_May). This suggests that variations in both precipitation and temperature significantly influence agricultural and climate vulnerability in Goiás during these periods.

150 In Minas Gerais (MG), the total precipitation for May (prcptot\_May) was identified as the most critical variable, followed by the average temperature in March (temp\_Mar) and the extreme maximum temperature in August (tnx\_Ago). Additionally, the drought conditions in June (spei\_3month\_Jun) and April's diurnal temperature range (dtr\_Apr) were significant in influencing the state's climate impact.

155 Mato Grosso do Sul (MS) is significantly impacted by February's average temperature (temp\_Feb), with severe heat (su\_Feb) and drought conditions in June (spei\_6month\_Jun) being key factors. The diurnal temperature range in August (dtr\_Ago) and precipitation levels in April (prcptot\_Apr) highlight that both heat and variations in precipitation shape the climate patterns in the state.

For Rio Grande do Sul (RS), the diurnal temperature range in May (dtr\_May) emerges as the most crucial variable, with drought conditions in March (spi\_6month\_Mar) and elevated precipitation in August (prcptot\_Ago) and July (prcptot\_Jul) also

155 playing significant roles. This highlights the critical impact of the interplay between temperature and precipitation extremes in RS.

160 Lastly, São Paulo (SP) exhibits a significant trend where extreme temperatures in August (tnx\_Ago) and heavy rainfall in July (prcptot\_Jul) are the primary climate hazards, accompanied by other temperature indicators such as diurnal temperature range and extreme heat events. This focus on these factors underscores the vital impact of heat and precipitation patterns on the environmental and agricultural issues faced by São Paulo.

|     | Overall   | Variables       | rank | UF | dataset | month | hazards            |
|-----|-----------|-----------------|------|----|---------|-------|--------------------|
| 1   | 100.00000 | prcptot_Apr     | 1    | PR | Deral   | Apr   | mean_precipitation |
| 2   | 82.46489  | tnn_May         | 2    | PR | Deral   | May   | extreme_heat       |
| 3   | 75.13381  | temp_May        | 3    | PR | Deral   | May   | mean_air_temp      |
| 4   | 71.49528  | prcptot_Jul     | 4    | PR | Deral   | Jul   | mean_precipitation |
| 5   | 70.02075  | txn_May         | 5    | PR | Deral   | May   | extreme_heat       |
| 6   | 67.53607  | temp_Apr        | 6    | PR | Deral   | Apr   | mean_air_temp      |
| 7   | 64.57218  | tnx_Ago         | 7    | PR | Deral   | Ago   | extreme_heat       |
| 8   | 63.82222  | dtr_Ago         | 8    | PR | Deral   | Ago   | mean_air_temp      |
| 9   | 61.67738  | tnn_Feb         | 9    | PR | Deral   | Feb   | extreme_heat       |
| 10  | 61.62358  | temp_Ago        | 10   | PR | Deral   | Ago   | mean_air_temp      |
| 98  | 100.00000 | dtr_Apr         | 1    | GO | GDHY    | Apr   | mean_air_temp      |
| 99  | 97.50680  | tnn_May         | 2    | GO | GDHY    | May   | extreme_heat       |
| 100 | 65.78049  | txn_May         | 3    | GO | GDHY    | May   | extreme_heat       |
| 101 | 64.64102  | tnn_Jun         | 4    | GO | GDHY    | Jun   | extreme_heat       |
| 102 | 59.29969  | prcptot_Feb     | 5    | GO | GDHY    | Feb   | mean_precipitation |
| 103 | 38.93645  | tnx_Jun         | 6    | GO | GDHY    | Jun   | extreme_heat       |
| 104 | 36.49084  | prcptot_May     | 7    | GO | GDHY    | May   | mean_precipitation |
| 105 | 27.97299  | txn_Jun         | 8    | GO | GDHY    | Jun   | extreme_heat       |
| 106 | 21.80135  | temp_Jun        | 9    | GO | GDHY    | Jun   | mean_air_temp      |
| 107 | 19.81397  | tnx_Ago         | 10   | GO | GDHY    | Ago   | extreme_heat       |
| 192 | 100.00000 | prcptot_May     | 1    | MG | GDHY    | May   | mean_precipitation |
| 193 | 78.72920  | temp_Mar        | 2    | MG | GDHY    | Mar   | mean_air_temp      |
| 194 | 75.93930  | dtr_May         | 3    | MG | GDHY    | May   | mean_air_temp      |
| 195 | 53.84657  | tnx_Ago         | 5    | MG | GDHY    | Ago   | extreme_heat       |
| 196 | 50.52855  | dtr_Apr         | 6    | MG | GDHY    | Apr   | mean_air_temp      |
| 197 | 45.21166  | txn_Mar         | 7    | MG | GDHY    | Mar   | extreme_heat       |
| 198 | 44.15792  | dtr_Mar         | 8    | MG | GDHY    | Mar   | mean_air_temp      |
| 199 | 41.63691  | txx_Ago         | 10   | MG | GDHY    | Ago   | extreme_heat       |
| 284 | 100.00000 | temp_Feb        | 1    | MS | GDHY    | Feb   | mean_air_temp      |
| 285 | 65.96125  | su_Feb          | 2    | MS | GDHY    | Feb   | extreme_heat       |
| 286 | 55.30782  | tnx_Feb         | 3    | MS | GDHY    | Feb   | extreme_heat       |
| 287 | 40.40994  | spei_6month_Jun | 4    | MS | GDHY    | Jun   | drought            |
| 288 | 39.67969  | txn_May         | 5    | MS | GDHY    | May   | extreme_heat       |
| 289 | 31.04435  | tx90p_May       | 7    | MS | GDHY    | May   | extreme_heat       |
| 290 | 26.72179  | dtr_Ago         | 8    | MS | GDHY    | Ago   | mean_air_temp      |
| 291 | 24.86532  | prcptot_Apr     | 9    | MS | GDHY    | Apr   | mean_precipitation |

|     |           |                 |    |    |      |     |                     |
|-----|-----------|-----------------|----|----|------|-----|---------------------|
| 292 | 24.72938  | tnn_May         | 10 | MS | GDHY | May | extreme_heat        |
| 389 | 100.00000 | tnx_Ago         | 1  | PR | GDHY | Ago | extreme_heat        |
| 390 | 61.89264  | temp_Ago        | 2  | PR | GDHY | Ago | mean_air_temp       |
| 391 | 43.43037  | txn_May         | 3  | PR | GDHY | May | extreme_heat        |
| 392 | 42.71941  | temp_May        | 4  | PR | GDHY | May | mean_air_temp       |
| 393 | 29.23238  | tnn_May         | 5  | PR | GDHY | May | extreme_heat        |
| 394 | 21.88527  | tnx_May         | 6  | PR | GDHY | May | extreme_heat        |
| 395 | 21.65946  | dtr_Apr         | 7  | PR | GDHY | Apr | mean_air_temp       |
| 396 | 15.10926  | dtr_May         | 8  | PR | GDHY | May | mean_air_temp       |
| 397 | 13.37548  | dtr_Ago         | 9  | PR | GDHY | Ago | mean_air_temp       |
| 398 | 13.15006  | tnn_Mar         | 10 | PR | GDHY | Mar | extreme_heat        |
| 487 | 100.00000 | dtr_May         | 1  | RS | GDHY | May | mean_air_temp       |
| 488 | 82.31632  | spi_6month_Mar  | 2  | RS | GDHY | Mar | drought             |
| 489 | 68.54319  | prcptot_Ago     | 3  | RS | GDHY | Ago | mean_precipitation  |
| 490 | 64.07012  | dtr_Ago         | 4  | RS | GDHY | Ago | mean_air_temp       |
| 491 | 59.57734  | tnn_Jun         | 5  | RS | GDHY | Jun | extreme_heat        |
| 492 | 53.79602  | spei_3month_Jul | 6  | RS | GDHY | Jul | drought             |
| 493 | 49.04170  | prcptot_Jul     | 8  | RS | GDHY | Jul | mean_precipitation  |
| 494 | 46.64403  | tx10p_May       | 9  | RS | GDHY | May | cold_spell          |
| 495 | 45.34317  | tx10p_Apr       | 10 | RS | GDHY | Apr | cold_spell          |
| 588 | 100.00000 | dtr_Apr         | 1  | SC | GDHY | Apr | mean_air_temp       |
| 589 | 96.40534  | dtr_Ago         | 2  | SC | GDHY | Ago | mean_air_temp       |
| 590 | 96.37887  | dtr_May         | 3  | SC | GDHY | May | mean_air_temp       |
| 591 | 87.34563  | r10mm_Ago       | 5  | SC | GDHY | Ago | heavy_precipitation |
| 592 | 84.21535  | txx_May         | 6  | SC | GDHY | May | extreme_heat        |
| 593 | 77.93737  | tnn_Jun         | 7  | SC | GDHY | Jun | extreme_heat        |
| 594 | 77.68189  | prcptot_Ago     | 8  | SC | GDHY | Ago | mean_precipitation  |
| 595 | 77.21550  | spi_6month_Mar  | 9  | SC | GDHY | Mar | drought             |
| 596 | 75.58487  | spei_3month_Ago | 10 | SC | GDHY | Ago | drought             |
| 687 | 100.00000 | tnx_Ago         | 1  | SP | GDHY | Ago | extreme_heat        |
| 688 | 32.19566  | prcptot_Jul     | 2  | SP | GDHY | Jul | mean_precipitation  |
| 689 | 23.34099  | prcptot_Feb     | 3  | SP | GDHY | Feb | mean_precipitation  |
| 690 | 20.77636  | dtr_Jul         | 4  | SP | GDHY | Jul | mean_air_temp       |
| 691 | 20.63356  | txx_Ago         | 5  | SP | GDHY | Ago | extreme_heat        |
| 692 | 19.63010  | txn_Mar         | 6  | SP | GDHY | Mar | extreme_heat        |



|      |           |                 |    |    |      |     |                    |
|------|-----------|-----------------|----|----|------|-----|--------------------|
| 693  | 17.00114  | dtr_Apr         | 7  | SP | GDHY | Apr | mean_air_temp      |
| 694  | 16.21477  | tnn_Feb         | 8  | SP | GDHY | Feb | extreme_heat       |
| 695  | 12.99909  | tnn_Mar         | 10 | SP | GDHY | Mar | extreme_heat       |
| 787  | 100.00000 | tnn_Feb         | 1  | GO | IBGE | Feb | extreme_heat       |
| 788  | 97.29698  | txx_Jul         | 2  | GO | IBGE | Jul | extreme_heat       |
| 789  | 95.93036  | txx_May         | 3  | GO | IBGE | May | extreme_heat       |
| 790  | 85.09398  | tnx_May         | 4  | GO | IBGE | May | extreme_heat       |
| 791  | 82.40128  | temp_May        | 5  | GO | IBGE | May | mean_air_temp      |
| 792  | 77.77108  | dtr_Apr         | 6  | GO | IBGE | Apr | mean_air_temp      |
| 793  | 77.47015  | prcptot_Apr     | 7  | GO | IBGE | Apr | mean_precipitation |
| 794  | 76.32820  | tnx_Apr         | 8  | GO | IBGE | Apr | extreme_heat       |
| 795  | 74.88640  | temp_Jul        | 9  | GO | IBGE | Jul | mean_air_temp      |
| 887  | 100.00000 | tx90p_Apr       | 1  | MG | IBGE | Apr | extreme_heat       |
| 888  | 79.61648  | temp_Apr        | 2  | MG | IBGE | Apr | mean_air_temp      |
| 889  | 62.98098  | spei_3month_Jun | 3  | MG | IBGE | Jun | drought            |
| 890  | 62.76512  | tx90p_May       | 4  | MG | IBGE | May | extreme_heat       |
| 891  | 61.25962  | spei_3month_Jul | 5  | MG | IBGE | Jul | drought            |
| 892  | 60.48007  | tnx_Apr         | 6  | MG | IBGE | Apr | extreme_heat       |
| 893  | 58.55813  | dtr_Ago         | 7  | MG | IBGE | Ago | mean_air_temp      |
| 894  | 58.21883  | dtr_Jul         | 8  | MG | IBGE | Jul | mean_air_temp      |
| 895  | 57.59278  | dtr_Apr         | 9  | MG | IBGE | Apr | mean_air_temp      |
| 896  | 57.09095  | prcptot_May     | 10 | MG | IBGE | May | mean_precipitation |
| 982  | 100.00000 | temp_Apr        | 1  | MS | IBGE | Apr | mean_air_temp      |
| 983  | 93.00263  | tnn_Jun         | 2  | MS | IBGE | Jun | extreme_heat       |
| 984  | 54.44418  | su_Apr          | 3  | MS | IBGE | Apr | extreme_heat       |
| 985  | 52.53396  | tnx_Jun         | 4  | MS | IBGE | Jun | extreme_heat       |
| 986  | 49.29613  | prcptot_Feb     | 5  | MS | IBGE | Feb | mean_precipitation |
| 987  | 46.85822  | tx90p_Apr       | 6  | MS | IBGE | Apr | extreme_heat       |
| 988  | 36.94694  | temp_Jun        | 7  | MS | IBGE | Jun | mean_air_temp      |
| 989  | 35.53650  | prcptot_Apr     | 8  | MS | IBGE | Apr | mean_precipitation |
| 990  | 28.44460  | txx_May         | 9  | MS | IBGE | May | extreme_heat       |
| 991  | 27.73175  | dtr_Feb         | 10 | MS | IBGE | Feb | mean_air_temp      |
| 1088 | 100.00000 | txn_Feb         | 1  | PR | IBGE | Feb | extreme_heat       |
| 1089 | 98.37288  | temp_Apr        | 2  | PR | IBGE | Apr | mean_air_temp      |
| 1090 | 96.48529  | txn_Apr         | 3  | PR | IBGE | Apr | extreme_heat       |
| 1091 | 92.21233  | temp_Mar        | 4  | PR | IBGE | Mar | mean_air_temp      |

|      |           |                 |    |    |      |     |               |
|------|-----------|-----------------|----|----|------|-----|---------------|
| 1092 | 90.94547  | txx_Apr         | 5  | PR | IBGE | Apr | extreme_heat  |
| 1093 | 88.86999  | temp_May        | 6  | PR | IBGE | May | mean_air_temp |
| 1094 | 88.01913  | tnx_Mar         | 7  | PR | IBGE | Mar | extreme_heat  |
| 1095 | 87.86547  | tnx_Ago         | 8  | PR | IBGE | Ago | extreme_heat  |
| 1096 | 85.80402  | txn_Mar         | 9  | PR | IBGE | Mar | extreme_heat  |
| 1097 | 84.62325  | temp_Feb        | 10 | PR | IBGE | Feb | mean_air_temp |
| 1186 | 100.00000 | txx_Ago         | 1  | SP | IBGE | Ago | extreme_heat  |
| 1187 | 64.92772  | tr_Ago          | 2  | SP | IBGE | Ago | extreme_heat  |
| 1188 | 62.51299  | temp_Jul        | 3  | SP | IBGE | Jul | mean_air_temp |
| 1189 | 43.94459  | tnx_Ago         | 4  | SP | IBGE | Ago | extreme_heat  |
| 1190 | 27.14802  | txn_Apr         | 5  | SP | IBGE | Apr | extreme_heat  |
| 1191 | 26.54685  | temp_Ago        | 6  | SP | IBGE | Ago | mean_air_temp |
| 1192 | 23.82096  | txx_Jul         | 7  | SP | IBGE | Jul | extreme_heat  |
| 1193 | 23.60973  | spei_3month_May | 8  | SP | IBGE | May | drought       |
| 1194 | 22.30100  | dtr_Feb         | 9  | SP | IBGE | Feb | mean_air_temp |

**Table S2.** Variable Importance Analysis in Random Forest Models for Maize Yield Prediction Across Brazilian States. The figure illustrates the variable importance scores obtained from Random Forest models applied to three distinct datasets: Deral, IBGE, and GDHY, encompassing seven Brazilian states - PR, SP, MS, MG, and GO

## References

- Ai, Z. and Hanasaki, N.: Simulation of crop yield using the global hydrological model H08 (crp. v1), *Geoscientific Model Development*, 16, 3275–3290, 2023.
- Breusch, T. S. and Pagan, A. R.: A simple test for heteroscedasticity and random coefficient variation, *Econometrica: Journal of the econometric society*, pp. 1287–1294, <https://doi.org/10.2307/1911963>, 1979.
- 165 Cleveland, W. S., Grosse, E., and Shyu, W. M.: Local regression models, in: *Statistical models in S*, pp. 309–376, Routledge, 2017.
- de Geografia e Estatística, I. B.: *Produção Agrícola Municipal 2022*, <http://www.sidra.ibge.gov.br/bda/pesquisas/pam>, 2022.
- Harri, A., Coble, K. H., Ker, A. P., and Goodwin, B. J.: Relaxing heteroscedasticity assumptions in area-yield crop insurance rating, *American Journal of Agricultural Economics*, 93, 707–717, <https://doi.org/10.1093/ajae/aar009>, 2011.
- 170 Hijmans, R. J.: terra: Spatial Data Analysis, <https://CRAN.R-project.org/package=terra>, r package version 1.7-29, 2023.
- Iizumi, T. and Sakai, T.: The global dataset of historical yields for major crops 1981–2016, *Scientific Data*, 7, 97, <https://doi.org/10.1038/s41597-020-0433-7>, 2020.
- Iizumi, T., Yokozawa, M., Sakurai, G., Travasso, M. I., Romanenkov, V., Oettli, P., Newby, T., Ishigooka, Y., and Furuya, J.: Historical changes in global yields: major cereal and legume crops from 1982 to 2006, *Global ecology and biogeography*, 23, 346–357, <https://doi.org/10.1111/geb.12120>, 2014.
- 175 Liu, Y. and Ker, A. P.: When less is more: on the use of historical yield data with application to rating area crop insurance contracts, *Journal of Agricultural and Applied Economics*, 52, 194–203, <https://doi.org/10.1017/aae.2019.40>, 2020.
- Lundberg, S.: A game theoretic approach to explain the output of any machine learning model, <https://github.com/shap/shap>, [Accessed 30-10-2023], 2023.
- 180 Mann, H. B.: Nonparametric tests against trend, *Econometrica: Journal of the econometric society*, pp. 245–259, 1945.
- McLeod, A.: Kendall: Kendall Rank Correlation and Mann-Kendall Trend Test, <https://CRAN.R-project.org/package=Kendall>, r package version 2.2.1, 2022.
- Monfreda, C., Ramankutty, N., and Foley, J. A.: Farming the planet: 2. Geographic distribution of crop areas, yields, physiological types, and net primary production in the year 2000, *Global biogeochemical cycles*, 22, <https://doi.org/10.1029/2007GB002947>, 2008.
- 185 Ozaki, V. A., Goodwin, B. K., and Shirota, R.: Parametric and nonparametric statistical modelling of crop yield: implications for pricing crop insurance contracts, *Applied Economics*, 40, 1151–1164, <https://doi.org/10.2307/1907187>, 2008.
- Rodrigues, M., Corá, J. E., Castrignanò, A., Mueller, T. G., and Rienzi, E.: A Spatial and Temporal Prediction Model of Corn Grain Yield as a Function of Soil Attributes., *Agronomy Journal*, pp. 1878–1887, <https://doi.org/10.2134/agronj2012.0456>, 2013.
- Rosenzweig, C., Elliott, J., Deryng, D., Ruane, A. C., Müller, C., Arneth, A., Boote, K. J., Folberth, C., Glotter, M., Khabarov, N., et al.: Assessing agricultural risks of climate change in the 21st century in a global gridded crop model intercomparison, *Proceedings of the national academy of sciences*, 111, 3268–3273, <https://doi.org/10.1073/pnas.1222463110>, 2014.
- 190 Sacks, W. J., Deryng, D., Foley, J. A., and Ramankutty, N.: Crop planting dates: an analysis of global patterns, *Global ecology and biogeography*, 19, 607–620, <https://doi.org/10.1111/j.1466-8238.2010.00551.x>, 2010.
- Sinnathamby, S., Douglas-Mankin, K. R., and Craige, C.: Field-scale calibration of crop-yield parameters in the Soil and Water Assessment Tool (SWAT), *Agricultural water management*, 180, 61–69, <https://doi.org/10.1016/j.agwat.2016.10.024>, 2017.
- 195 Tolhurst, T. N. and Ker, A. P.: On technological change in crop yields, *American Journal of Agricultural Economics*, 97, 137–158, <https://doi.org/stable/24477005>, 2015.
- Vicente, J. R.: Economic efficiency of agricultural production in Brazil, *Revista de Economia e Sociologia Rural*, 42, 201–222, 2004.
- Wang, J., Wei, J., Shan, W., and Zhao, J.: Modeling the water-energy-food-environment nexus and transboundary cooperation opportunity in the Brahmaputra River Basin, *Journal of Hydrology: Regional Studies*, 49, 101–149, <https://doi.org/10.1016/j.ejrh.2023.101497>, 2023.
- 200 Yang, S.-R., Koo, W. W., and Wilson, W. W.: Heteroskedasticity in crop yield models, *Journal of Agricultural and Resource Economics*, pp. 103–109, <https://www.jstor.org/stable/40986743>, 1992.
- Zhu, Y., Goodwin, B. K., and Ghosh, S. K.: Modeling yield risk under technological change: Dynamic yield distributions and the US crop insurance program, *Journal of Agricultural and Resource Economics*, pp. 192–210, <https://www.jstor.org/stable/23243141>, 2011.
